# Supplementary material
Source: Springer Nature journal article supplement (https://www.springermedizin.de/resource/supplementary/12888_2014_1654_MOESM9_ESM.pdf/9481114)

A

R

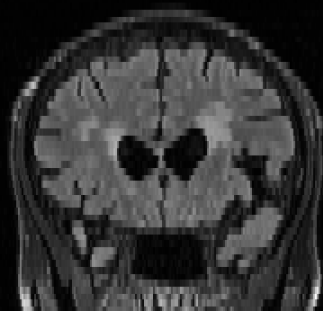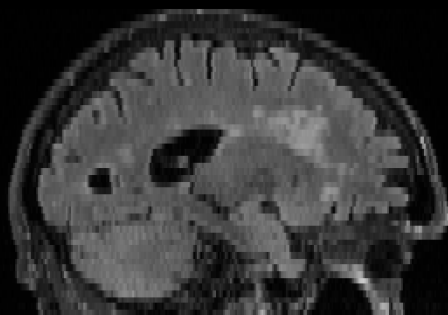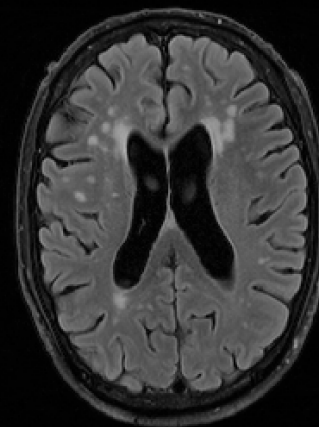

L

B

R

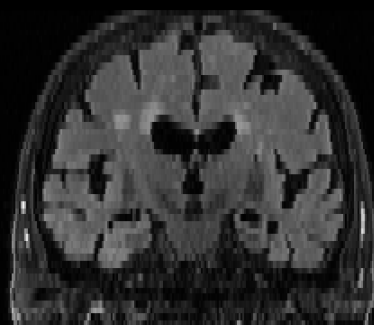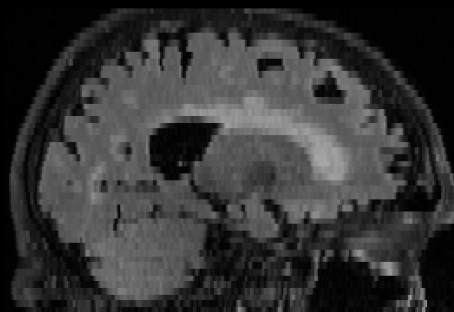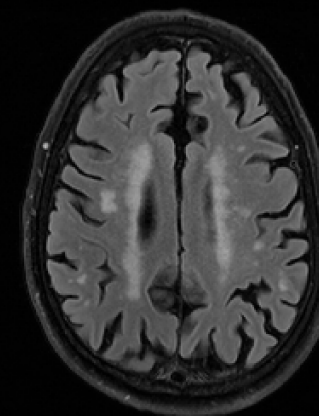

L

C

R

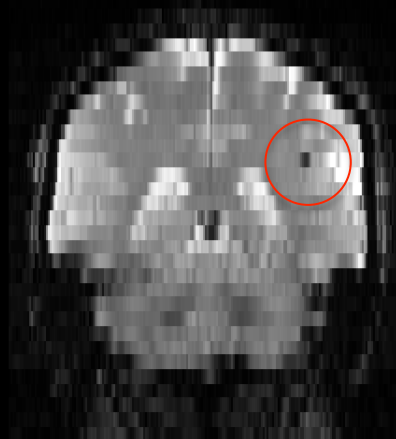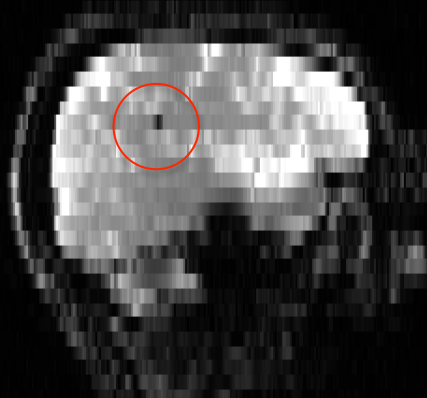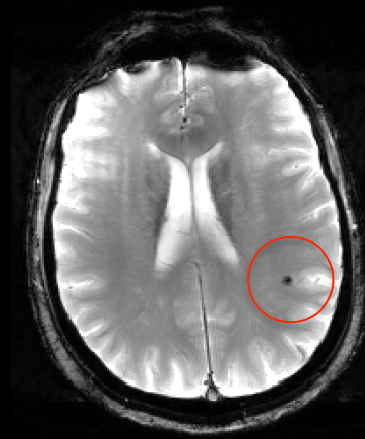

L

Supplement: MOESM9 [file 9481114]
